# Supplementary material for: 2′-O-Methyl modified guide RNA promotes the single nucleotide polymorphism (SNP) discrimination ability of CRISPR–Cas12a systems
Source: Royal Society of Chemistry journal article supplement (doi:10.1039/d1sc06832f), 2022-01-01
Supplement: d1sc06832f1.pdf [file d1sc06832f1.pdf]

Electronic Supplementary Material (ESI) for Chemical Science.  
This journal is © The Royal Society of Chemistry 2021

**2'-O-Methyl modified guide RNA promotes the single nucleotide polymorphisms (SNPs)  
discrimination ability of CRISPR-Cas12a systems**

Yuqing Ke,<sup>a</sup> Behafarid Ghalandari,<sup>a</sup> Shiyi Huang,<sup>a</sup> Sijie Li,<sup>a</sup> Chengjie Huang,<sup>a</sup> Xiao Zhi,<sup>\*a</sup>  
Daxiang Cui<sup>b</sup> and Xianting Ding<sup>\*a</sup>

<sup>a</sup>State Key Laboratory of Oncogenes and Related Genes, Institute for Personalized Medicine, School of Biomedical Engineering, Shanghai Jiao Tong University, Shanghai 200030, China.  
<sup>b</sup>Shanghai Engineering Centre for Intelligent Diagnosis and Treatment Instrument, School of Electronic Information and Electrical Engineering, Shanghai Jiao Tong University Shanghai 200240, China.

**Corresponding Author**

E-mail: [dingxianting@sjtu.edu.cn](mailto:dingxianting@sjtu.edu.cn)

**This PDF file includes:**

Supplementary Figure S1 to S7

Supplementary Table S1 to S4

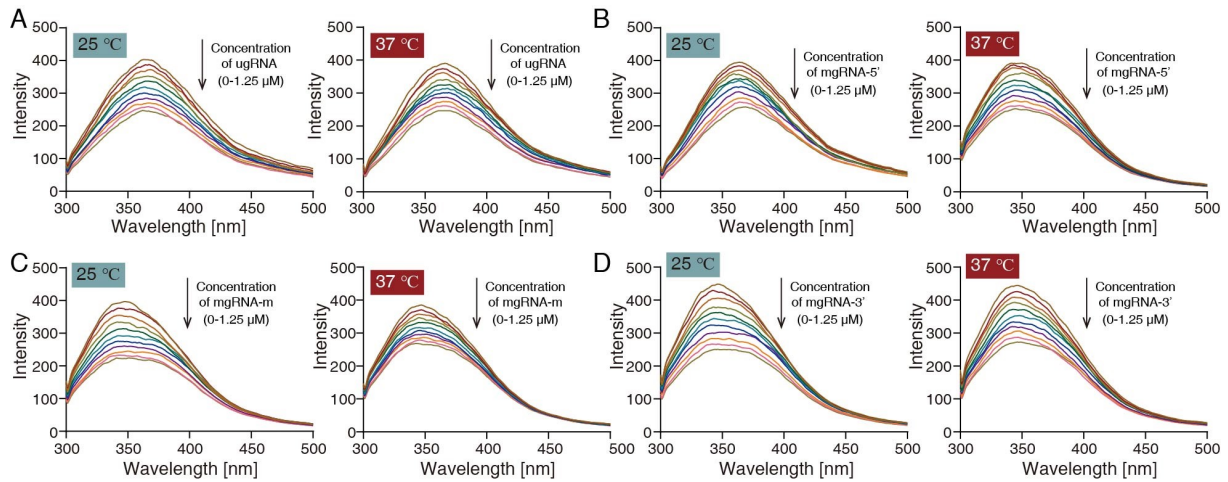

**Figure S1.** Fluorescence spectra of Cas12a binding with various concentrations of gRNAs (0 – 1.25  $\mu\text{M}$ ) at 25  $^{\circ}\text{C}$  and 37  $^{\circ}\text{C}$ . A) Cas12a binding with ugRNA at 25  $^{\circ}\text{C}$  (left) and 37  $^{\circ}\text{C}$  (right). B) Cas12a binding with mgRNA-5' at 25  $^{\circ}\text{C}$  (left) and 37  $^{\circ}\text{C}$  (right). C) Cas12a binding with mgRNA-m at 25  $^{\circ}\text{C}$  (left) and 37  $^{\circ}\text{C}$  (right). D) Cas12a binding with mgRNA-3' at 25  $^{\circ}\text{C}$  (left) and 37  $^{\circ}\text{C}$  (right).

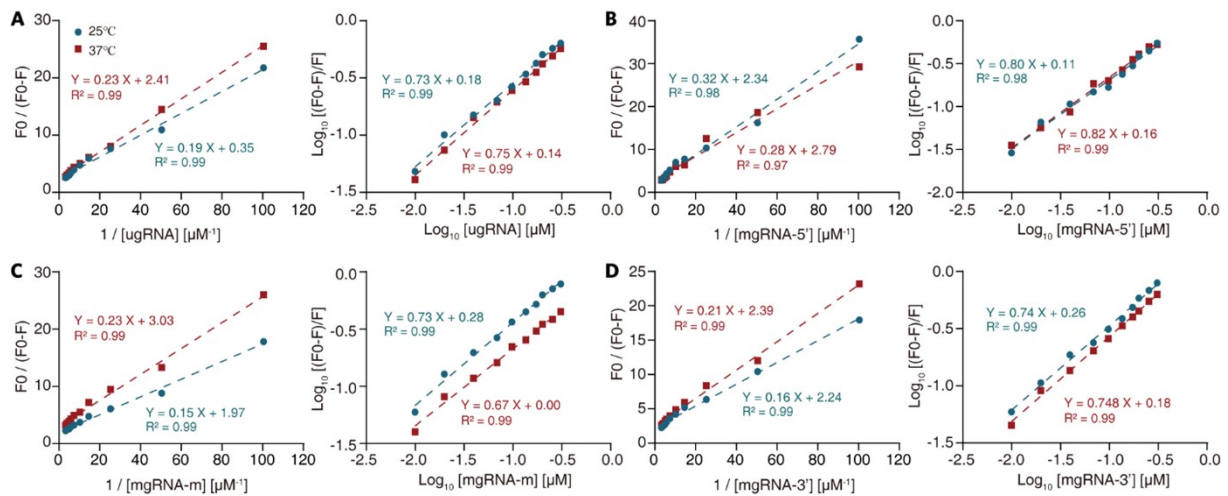

**Figure S2.** Stern-Volmer plots of Cas12a binding with gRNAs at 25  $^{\circ}\text{C}$  and 37  $^{\circ}\text{C}$ . A) Cas12a interacting with ugRNA. B) Cas12a binding with mgRNA-5'. C) Cas12a binding with mgRNA-m. D) Cas12a binding with mgRNA-3'.

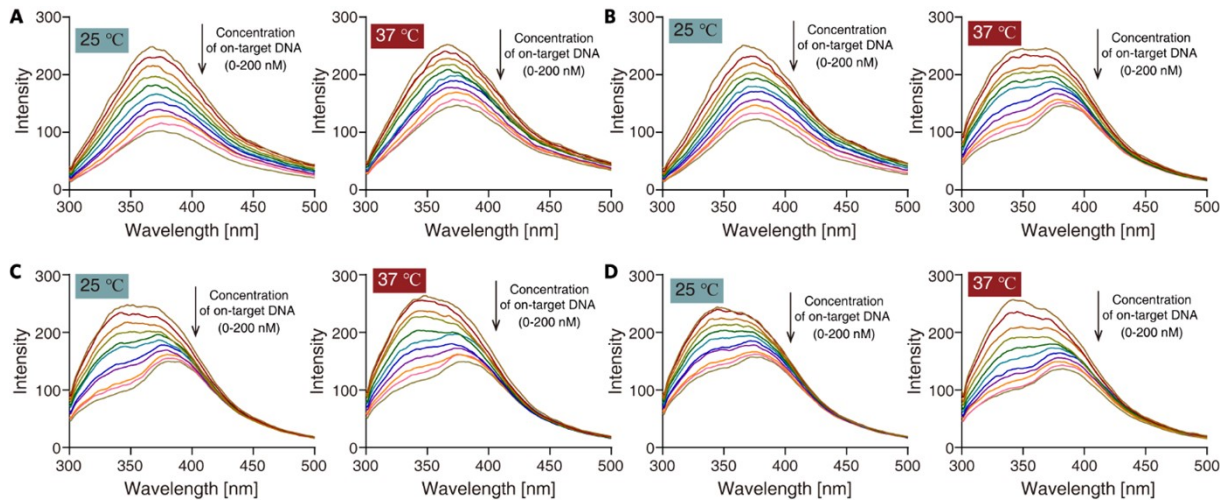

**Figure S3.** Fluorescence spectra of Cas12a/gRNA complex binding with various concentrations of off-target DNA (0 – 200 nM) at 25 °C and 37 °C. A) Cas12a binding with ugRNA at 25 °C (left) and 37 °C (right). B) Cas12a binding with mgRNA-5' at 25 °C (left) and 37 °C (right). C) Cas12a binding with mgRNA-m at 25 °C (left) and 37 °C (right). D) Cas12a binding with mgRNA-3' at 25 °C (left) and 37 °C (right).

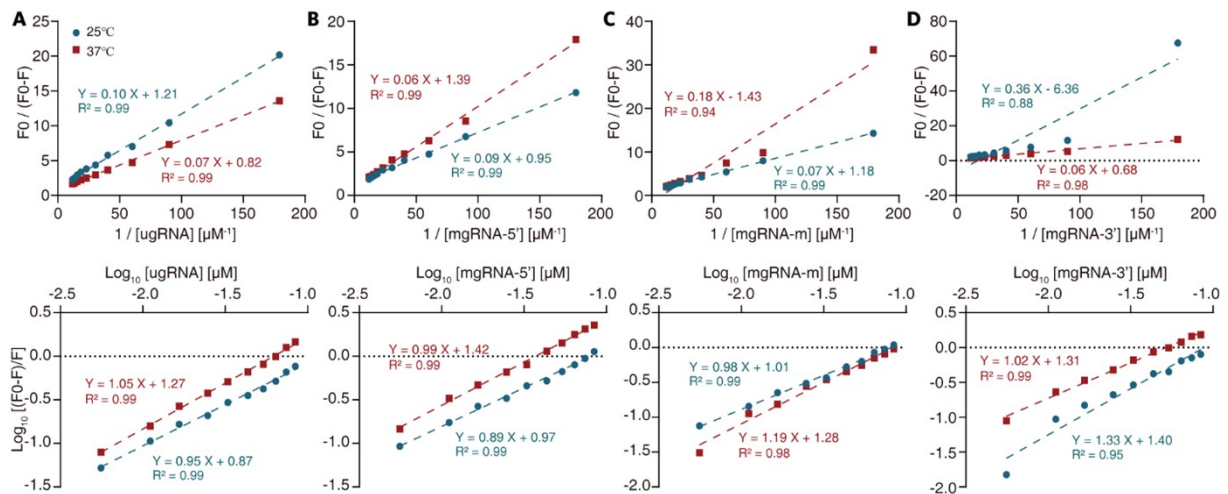

**Figure S4.** Stern-Volmer plots of Cas12a/gRNA complex interacting with off-target DNA at 25 °C and 37 °C. A) Cas12a interacting with ugRNA. B) Cas12a binding with mgRNA-5'. C) Cas12a binding with mgRNA-m. D) Cas12a binding with mgRNA-3'.

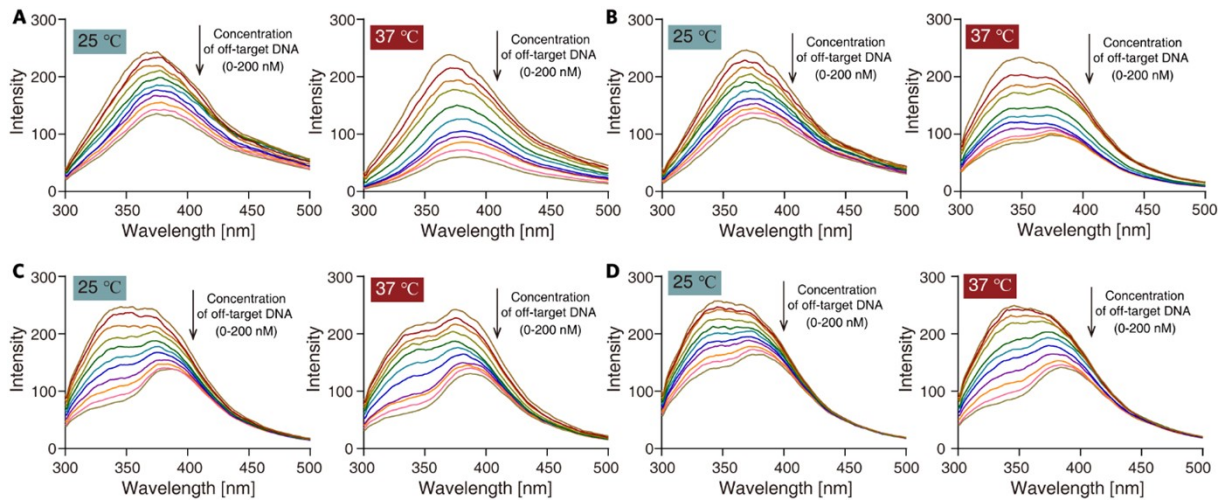

**Figure S5.** Fluorescence spectra of Cas12a/gRNA complex binding with various concentrations of off-target DNA (0 – 200 nM) at 25 °C and 37 °C. A) Cas12a/ugRNA binding with off-target DNA at 25 °C (left) and 37 °C (right). B) Cas12a/mgRNA-5' binding with off-target DNA at 25 °C (left) and 37 °C (right). C) Cas12a/mgRNA-m binding with off-target DNA at 25 °C (left) and 37 °C (right). D) Cas12a/mgRNA-3' binding with off-target DNA at 25 °C (left) and 37 °C (right).

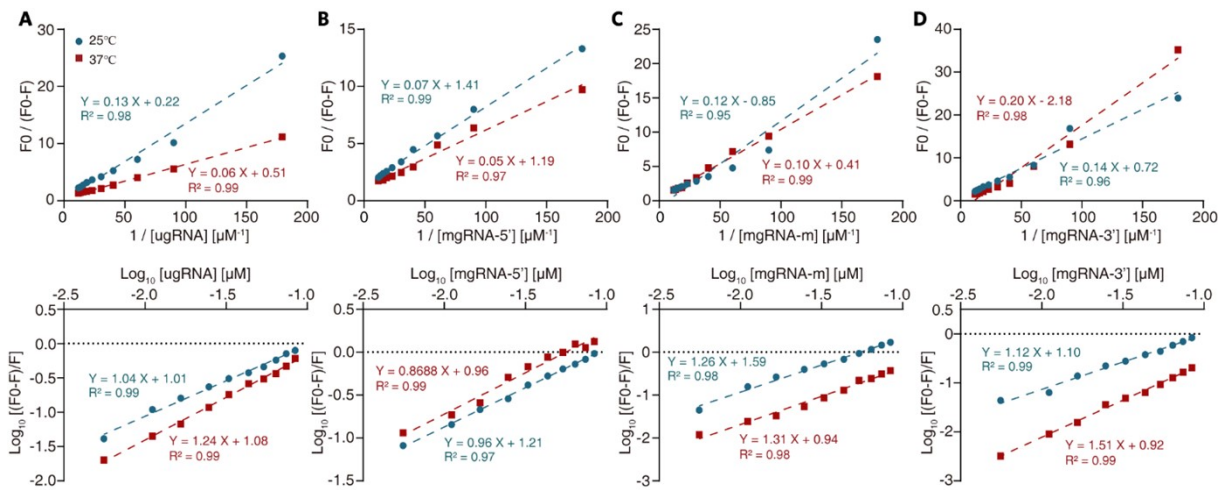

**Figure S6.** Stern-Volmer plots of Cas12a/gRNA complex interacting with off-target DNA at 25 °C and 37 °C. A) Cas12a interacting with ugRNA. B) Cas12a binding with mgRNA-5'. C) Cas12a binding with mgRNA-m. D) Cas12a binding with mgRNA-3'.



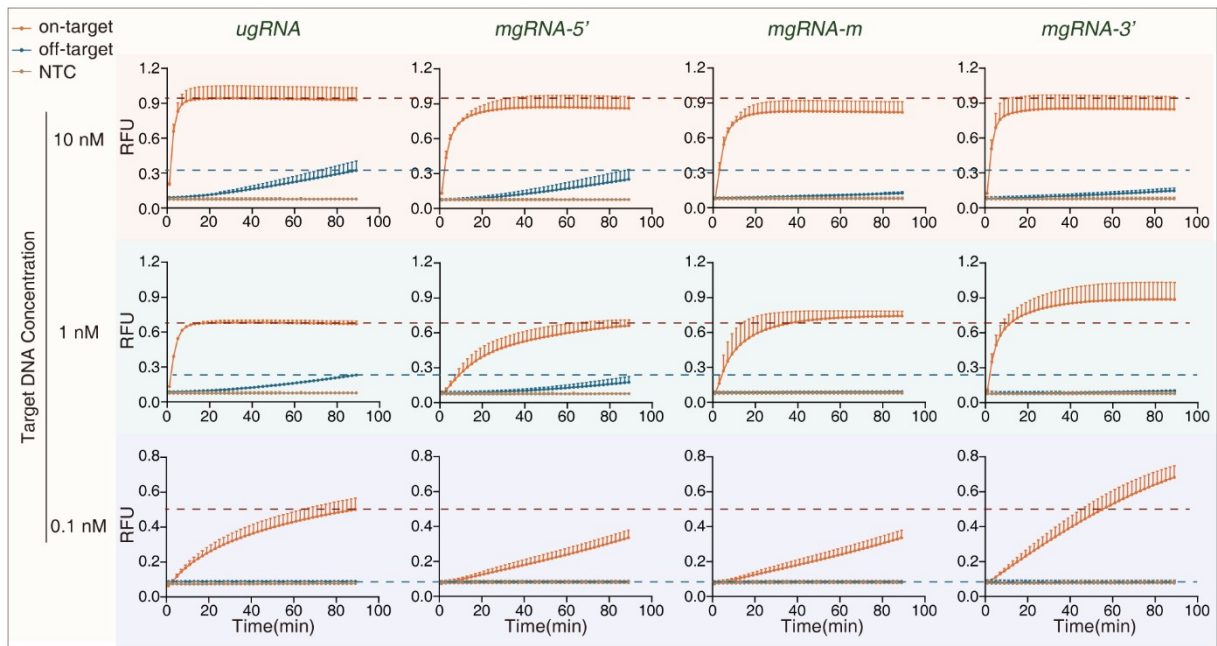

**Figure S7.** Fluorescence Kinetics of Cas12a's specificity tests. On-target (HBV B-type) DNA signal is shown in orange, off-target (HBV C-type) DNA signal is in blue, and non-target control (NTC) signal is in brown. The final on-target signal for ugRNA at 90 min is highlighted with red dot line, while the off-target signal is marked with cyan dot line. Target DNA concentration at 10 nM, 1 nM and 0.1 nM were tested for all gRNAs.

**Table S1.** Gibbs free energy results of the Cas12a protein interacting with gRNA and target DNA at 37 °C

| Group                  | $\Delta G^0_1$<br>[kJ·mol <sup>-1</sup> ] | $\Delta G^0_{2-[on]}$<br>[kJ·mol <sup>-1</sup> ] | $\Delta G^0_{2-[off]}$<br>[kJ·mol <sup>-1</sup> ] | $\Delta G$<br>[kJ·mol <sup>-1</sup> ] | $\Delta G^0_1 + \Delta G^0_{2-[on]}$<br>[kJ·mol <sup>-1</sup> ] |
|------------------------|-------------------------------------------|--------------------------------------------------|---------------------------------------------------|---------------------------------------|-----------------------------------------------------------------|
| ugRNA                  | -36.45                                    | -43.16                                           | -42.03                                            | 1.13                                  | -79.61                                                          |
| mgRNA-5' <sup>a)</sup> | -36.57                                    | -44.05                                           | -42.81                                            | 1.24                                  | -80.62                                                          |
| mgRNA-m <sup>b)</sup>  | -35.63                                    | -43.22                                           | -41.21                                            | 2.01                                  | -78.85                                                          |
| mgRNA-3' <sup>c)</sup> | -36.69                                    | -43.40                                           | -41.08                                            | 2.32                                  | -80.09                                                          |

<sup>a)</sup> mgRNA-5' has 2'-OMe modifications at the 5'-end;

<sup>b)</sup> mgRNA-m has 2'-OMe modifications at the middle region;

<sup>c)</sup> mgRNA-3' has 2'-OMe modifications at the 3'-end.

**Table S2.** PCR primers and ssDNA fluorescence reporter used in this study

| Name                          | Sequence                      |
|-------------------------------|-------------------------------|
| HBV PCR forward primer        | 5'-GGACTTCTCTCAATTTTCTAGGG-3' |
| HBV PCR reverse primer        | 5'-ACTTTCCAATCAATAGG-3'       |
| SARS-CoV-2 PCR reverse primer | 5'-GTGATGCTGTCCGTGATCCA-3'    |
| SARS-CoV-2 PCR reverse primer | 5'-AGCGCATATACCTGCACCAA-3'    |
| ssDNA fluorescence reporter   | 5'-HEX-AAAAAAAAAAAAA-BHQ1-3'  |

**Table S3.** Guide RNAs (gRNAs) used in this study

| Name                       | Whole sequence (from 5' to 3') <sup>a)</sup>           | 2'-O-Methyl modification positions |
|----------------------------|--------------------------------------------------------|------------------------------------|
| ugRNA                      | UAAUUUCUACUAAGUGUAG<br>AUUCAUCUUCCUCUGCAUCCUG          | \                                  |
| mgRNA-5'                   | <b>UAA</b> UUUCUACUAAGUGUAG<br>AUUCAUCUUCCUCUGCAUCCUG  | 1 , 2 , 3                          |
| mgRNA-m                    | UAAUUUCUACUAAGUGUAG<br>AU <b>UCA</b> UCUUCCUCUGCAUCCUG | 22 , 23 , 24                       |
| mgRNA-3'                   | UAAUUUCUACUAAGUGUAG<br>AUUCAUCUUCCUCUGCAUC <b>UG</b>   | 39 , 40 , 41                       |
| ugRNA-11 <sup>th</sup>     | UAAUUUCUACUAAGUGUAG<br>AUUACAGCAACAUGAGGGAAAC          | \                                  |
| mgRNA-11 <sup>th</sup> -5' | UAAUUUCUACUAAGUGUAG<br>AU <b>UAC</b> AGCAACAUGAGGGAAAC | 1 , 2 , 3                          |
| mgRNA-11 <sup>th</sup> -m  | UAAUUUCUACUAAGUGUAG<br>AU <b>UAC</b> AGCAACAUGAGGGAAAC | 22 , 23 , 24                       |
| mgRNA-11 <sup>th</sup> -3' | UAAUUUCUACUAAGUGUAG<br>AUUACAGCAACAUGAGGG <b>AAAC</b>  | 39 , 40 , 41                       |
| ugRNA-19 <sup>th</sup>     | UAAUUUCUACUAAGUGUAG<br>AUGGUAUACAUUUAAACCCUCA          | \                                  |
| mgRNA-19 <sup>th</sup> -5' | <b>UAA</b> UUUCUACUAAGUGUAG<br>AUGGUAUACAUUUAAACCCUCA  | 1 , 2 , 3                          |
| mgRNA-19 <sup>th</sup> -m  | UAAUUUCUACUAAGUGUAG<br>AU <b>GGU</b> AUACAUUUAAACCCUCA | 22 , 23 , 24                       |
| mgRNA-19 <sup>th</sup> -3' | UAAUUUCUACUAAGUGUAG<br>AUGGUAUACAUUUAAACCC <b>UCA</b>  | 39 , 40 , 41                       |

<sup>a)</sup> The 2'-Ome modified nucleotides are marked in red.



**Table S4.** Plasmids used in this study

| Name                    | Plasmid ID (catalog number) |
|-------------------------|-----------------------------|
| HBV B-genotype          | AF100309                    |
| HBV C-genotype          | AF461363                    |
| SARS-CoV-2 wild-type    | GS-200519_A001              |
| SARS-CoV-2 D614G mutant | GS-200519_A012              |
